# Supplementary material for: RAPIDprep: A Simple, Fast Protocol for RNA Metagenomic Sequencing of Clinical Samples
Source: MDPI journal article supplement (doi:10.3390/v15041006), 2023-04-19
Supplement: s1 [file s1]

## Article

# RAPIDprep: A Simple, Fast Protocol for RNA Metagenomic Sequencing of Clinical Samples

Rachel L. Tulloch <sup>1,2,†</sup> , Karan Kim <sup>1,2,†</sup>, Chisha Sikazwe <sup>3,4</sup> , Alice Michie <sup>3,4</sup>, Rebecca Burrell <sup>2,5</sup> , Edward C. Holmes <sup>2</sup> , Dominic E. Dwyer <sup>2,6</sup> , Philip N. Britton <sup>2,5</sup>, Jen Kok <sup>6</sup>  and John-Sebastian Eden <sup>1,2,\*</sup> 

<sup>1</sup> Centre for Virus Research, Westmead Institute for Medical Research, Westmead, NSW 2145, Australia

<sup>2</sup> Sydney Institute for Infectious Diseases, School of Medical Sciences, The University of Sydney, Sydney, NSW 2006, Australia

<sup>3</sup> PathWest Laboratory Medicine WA, Department of Microbiology, Nedlands, WA 6009, Australia

<sup>4</sup> School of Biomedical Sciences, The University of Western Australia, Crawley, WA 6009, Australia

<sup>5</sup> Departments of Infectious Diseases and Microbiology, The Children's Hospital at Westmead, Westmead, NSW 2145, Australia

<sup>6</sup> NSW Health Pathology Institute for Clinical Pathology and Medical Research, Westmead Hospital, Westmead, NSW 2145, Australia

\* Correspondence: js.eden@sydney.edu.au; Tel.: +61-2-8627-1817

† These authors contributed equally to this work.

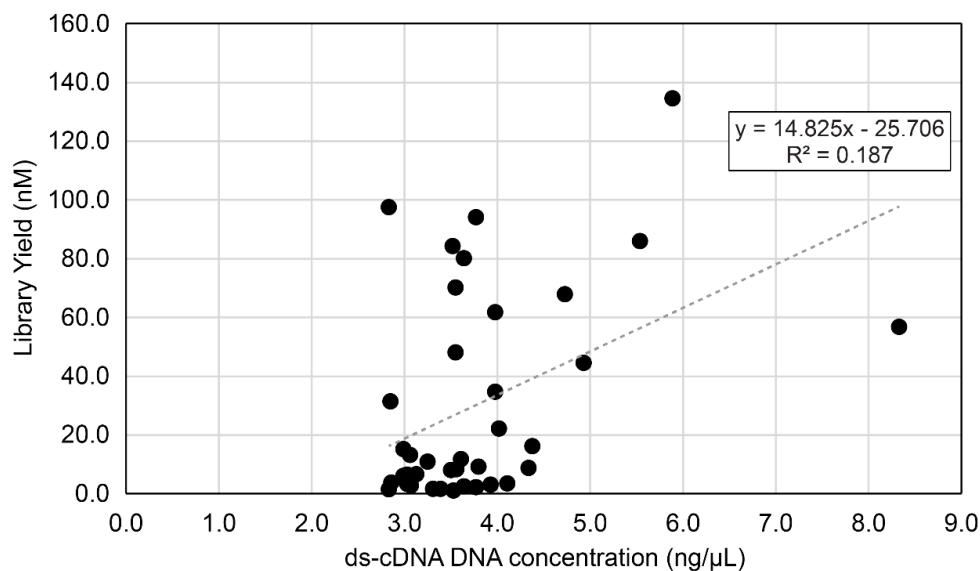

**Supplementary Figure S1 – Linear regression showing correlation between input ds-DNA concentration and library yield for the large RAPIDprep run (n=40 respiratory libraries).** The DNA concentration of the rRNA-depleted ds-cDNA libraries (ng/uL) – x-axis – was measured using the Qubit high sensitivity dsDNA assay and compared to the final library yield (nM) – y-axis – measured using the Agilent TapeStation. Linear regression was performed to determine correlation between the two measurements (grey dotted line) with the key showing the slope equation and goodness of fit ( $R^2$ ).

## Supplementary data

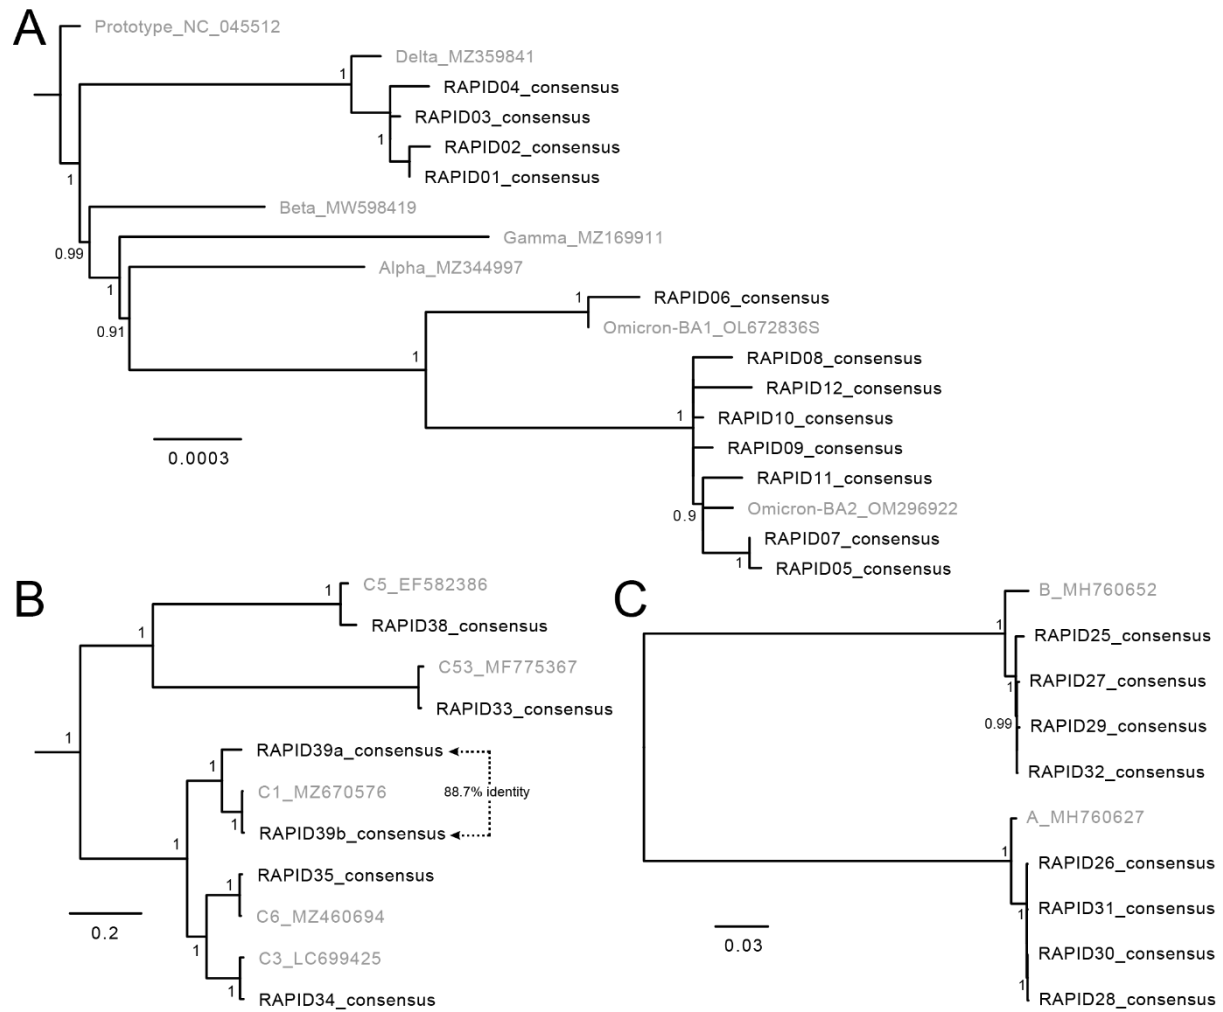

**Supplementary Figure S2 – Phylogenetic analysis of viruses identified by RAPIDprep assay.** Maximum likelihood phylogenies were estimated for (a) SARS-CoV-2, (b) rhinovirus and (c) RSV strain identified in this study (black text) against known reference strains (grey text). The GTR + Gamma DNA substitution model was used with 1000 bootstrap replicates to measure support (proportions indicates at each node). Each sequence is labelled according to the library name with multiple viruses indicated with an additional letter (i.e. RAPID39a and RAPID39b). The scales are proportional to the number of substitutions per site.

Supplementary data

**Supplementary Table S1** – Samples sequenced using RAPIDprep and a commercial assay

| Sample    | RAPIDprep      |                           | SMARTer Stranded Total RNA-Seq Kit v2 |                           |
|-----------|----------------|---------------------------|---------------------------------------|---------------------------|
|           | <i>Library</i> | <i>NCBI SRA accession</i> | <i>Library</i>                        | <i>NCBI SRA accession</i> |
| Zymo_2    | RAPID15        | SRR22726250               | ICU15                                 | SRR22838413               |
| Zymo_3a   | RAPID16        | SRR22726249               | ICU16                                 | SRR22838412               |
| ICU-001_1 | RAPID17        | SRR22726248               | ICU17                                 | SRR22838439               |
| ICU-002_1 | RAPID18        | SRR22726247               | ICU18                                 | SRR22838438               |
| ICU-007_1 | RAPID19        | SRR22726246               | ICU19                                 | SRR22838437               |
| ICU-007_2 | RAPID20        | SRR22726245               | ICU20                                 | SRR22838436               |
| ICU-007_3 | RAPID21        | SRR22726243               | ICU21                                 | SRR22838435               |
| ICU-075_1 | RAPID22        | SRR22726242               | ICU22                                 | SRR22838423               |
| ICU-077_1 | RAPID23        | SRR22726241               | ICU23                                 | SRR22838422               |
| ICU-102_1 | RAPID24        | SRR22726240               | ICU24                                 | SRR22838417               |

## Supplementary data

Supplementary Table S2 – Genomic yield, coverage, recovery and qPCR results

| Library | Virus      | Non-host,<br>non-rRNA | Viral reads  |            |                 | Coverage       |                 | qPCR      |
|---------|------------|-----------------------|--------------|------------|-----------------|----------------|-----------------|-----------|
|         |            | <i>reads</i>          | <i>reads</i> | <i>RPM</i> | <i>log(RPM)</i> | <i>depth X</i> | <i>genome %</i> | <i>Ct</i> |
| RPD01   | SARS-CoV-2 | 2,834,326             | 1,792,076    | 632,275.89 | 5.80            | 9,159.00       | 100.00          | 22.46     |
| RPD02   | SARS-CoV-2 | 1,461,808             | 4,552        | 3,113.95   | 3.49            | 21.50          | 99.50           | 30.23     |
| RPD03   | SARS-CoV-2 | 4,932,332             | 15,696       | 3,182.27   | 3.50            | 70.30          | 99.50           | 33.92     |
| RPD04   | SARS-CoV-2 | 3,530,136             | 2,768,186    | 784,158.46 | 5.89            | 15,815.00      | 100.00          | 20.37     |
| RPD05   | SARS-CoV-2 | 3,592,638             | 34,308       | 9,549.53   | 3.98            | 159.50         | 100.00          | 31.00     |
| RPD06   | SARS-CoV-2 | 3,170,060             | 2,651,566    | 836,440.32 | 5.92            | 13,626.00      | 100.00          | 23.47     |
| RPD07   | SARS-CoV-2 | 3,517,722             | 2,336,874    | 664,314.58 | 5.82            | 12,450.00      | 100.00          | 22.16     |
| RPD08   | SARS-CoV-2 | 1,723,666             | 1,470,634    | 853,201.26 | 5.93            | 7,675.00       | 100.00          | 22.46     |
| RPD09   | SARS-CoV-2 | 4,502,692             | 4,334,060    | 962,548.63 | 5.98            | 23,085.00      | 100.00          | 20.78     |
| RPD10   | SARS-CoV-2 | 119,716               | 9,580        | 80,022.72  | 4.90            | 46.30          | 99.90           | 30.57     |
| RPD11   | SARS-CoV-2 | 789,160               | 51,130       | 64,790.41  | 4.81            | 254.30         | 99.97           | 29.85     |
| RPD12   | SARS-CoV-2 | 988,654               | 949,790      | 960,689.99 | 5.98            | 4,877.00       | 100.00          | 21.75     |
| RPD25   | RSV        | 403,584               | 176          | 436.09     | 2.64            | 1.20           | 41.90           | 24.15     |
| RPD26   | RSV        | 269,136               | 2,466        | 9,162.65   | 3.96            | 22.90          | 99.97           | 19.20     |
| RPD27   | RSV        | 294,604               | 518          | 1,758.29   | 3.25            | 4.40           | 77.80           | 22.54     |
| RPD28   | RSV        | 316,712               | 248          | 783.05     | 2.89            | 2.30           | 72.00           | 21.23     |
| RPD29   | RSV        | 66,036                | 804          | 12,175.18  | 4.09            | 7.70           | 90.10           | 21.60     |
| RPD30   | RSV        | 5,898                 | 1,042        | 176,670.06 | 5.25            | 10.10          | 98.50           | 15.21     |
| RPD31   | RSV        | 17,584                | 816          | 46,405.82  | 4.67            | 7.90           | 93.80           | 17.18     |
| RPD32   | RSV        | 134,974               | 188          | 1,392.86   | 3.14            | 1.80           | 54.80           | 22.38     |
